# Supplementary material for: Adverse Childhood Experiences Predict the Phenome of Affective Disorders and These Effects Are Mediated by Staging, Neuroimmunotoxic and Growth Factor Profiles
Source: Cells. 2022 May 7;11(9):1564. doi: 10.3390/cells11091564 (PMC9105661; doi:10.3390/cells11091564)
Supplement: Supplementary file 1 [file cells-11-01564-s001.zip › cells-1681305-supplementary.pdf]

## **ELECTRONIC SUPPLEMENTARY FILE (ESF)**

Adverse childhood experiences are strongly associated with activation of M1 macrophage, T helper cell, neurotoxic and growth factor profiles and predict reoccurrence of illness and the phenome of affective disorders.

(1,2,3) Michael Maes, (1) Muanpetch Rachayon;; (1,4) Ketsupar Jirakran; (5,6) Pimpayao Sodsai; (5,6) Siriwan Klinchanhom; (7) Monojit Debnath; (8) Agnieska Basta-Kaim; (8) Marta Kubera; (1,9) Abbas F. Almulla; (1) Atapol Sughondhabirom.

(1) Department of Psychiatry, Faculty of Medicine, Chulalongkorn University and King Chulalongkorn Memorial Hospital, the Thai Red Cross Society, Bangkok, Thailand

(2) IMPACT Strategic Research Center, Barwon Health, Geelong, Australia

(3) Department of Psychiatry, Medical University of Plovdiv, Plovdiv, Bulgaria

(4) Maximizing Thai Children's Developmental Potential Research Unit, Department of Pediatrics, Faculty of Medicine, Chulalongkorn University, Bangkok, Thailand

(5) Center of Excellence in Immunology and Immune-Mediated Diseases, Department of Microbiology, Faculty of Medicine, Chulalongkorn University, Bangkok, Thailand

(6) Division of Immunology, Department of Microbiology, Faculty of Medicine, Chulalongkorn University, Bangkok, Thailand

(7) Department of Human Genetics, National Institute of Mental Health and Neurosciences, Bangalore, India

(8) Department of Experimental Neuroendocrinology, Polish Academy of Sciences, Kraków, Poland

(9) Medical Laboratory Technology Department, College of Medical Technology, The Islamic University, Najaf, Iraq.

**ESF Table S1.** The cytokines, chemokines and growth factors examined in the current study

| Protein abbreviations | Gene Symbol | Protein name                                                                                               |
|-----------------------|-------------|------------------------------------------------------------------------------------------------------------|
| IL-1 $\beta$          | IL1B        | Interleukin-1 $\beta$                                                                                      |
| IL-1RA                | IL1RN       | Interleukin-1 receptor antagonist                                                                          |
| IL-2                  | IL2         | Interleukin-2                                                                                              |
| IL-4                  | IL4         | Interleukin-4                                                                                              |
| IL-5                  | IL5         | Interleukin-5                                                                                              |
| IL-6                  | IL6         | Interleukin-6                                                                                              |
| IL-7                  | IL7         | Interleukin-7                                                                                              |
| CXCL8                 | CXCL8       | C-X-C motif chemokine ligand 8 (IL-8)                                                                      |
| IL-9                  | IL9         | Interleukin-9                                                                                              |
| IL-10                 | IL10        | Interleukin-10                                                                                             |
| IL-12                 | IL12        | Interleukin-12                                                                                             |
| IL-13                 | IL13        | Interleukin-13                                                                                             |
| IL-15                 | IL15        | Interleukin-15                                                                                             |
| IL-17                 | IL17        | Interleukin-17                                                                                             |
| CCL11                 | CCL11       | Eotaxin                                                                                                    |
| FGF2                  | FGF2        | Fibroblast growth factor 2, Basic fibroblast growth factor                                                 |
| G-CSF                 | CSF3        | Granulocyte Colony Stimulating Factor, Colony Stimulating Factor 3 (Granulocyte)                           |
| GM-CSF                | CSF2        | Granulocyte-macrophage colony-stimulating factor, Colony-stimulating factor 2                              |
| IFN- $\gamma$         | IFNG        | Interferon- $\gamma$                                                                                       |
| CXCL10                | CXCL10      | C-X-C motif chemokine ligand 8, Interferon gamma-induced protein 10 (IP10)                                 |
| CCL2                  | CCL2        | C-C Motif Chemokine Ligand 2 (MCP1)                                                                        |
| CCL3 / MIP-1 $\alpha$ | CCL3        | Macrophage inflammatory protein-1 alpha, C-C Motif Chemokine Ligand 3                                      |
| PDGF                  | PDGFA       | Platelet Derived Growth Factor Subunit A                                                                   |
| CCL4 / MIP-1 $\beta$  | CCL4        | C-C Motif Chemokine Ligand 4, Macrophage Inflammatory Protein 1-Beta, Lymphocyte Activation Gene 1 Protein |
| CCL5 / RANTES         | CCL5        | C-C Motif Chemokine Ligand 5, Regulated Upon Activation, Normally T-Expressed, And Presumably Secreted     |
| TNF- $\alpha$         | TNF         | Tumor Necrosis Factor-Alpha                                                                                |
| VEGF                  | VEGFA       | Vascular Endothelial Growth Factor                                                                         |

Adapted from: Rachayon, M.; Jirakran, K; Sodsai, P; Klinchanhom, S.; Sughondhabirom, A.; Plaimas, K.; Suratane, A.; Maes, M. Effects of cannabidiol on activated immune-inflammatory pathways in major depressive patients and healthy controls. Pharmaceuticals, 2022, in press.

**ESF Table S2.** The 9 immune and growth factor profiles employed in this study

| Immune Profile   | Members                                                                                                                        |
|------------------|--------------------------------------------------------------------------------------------------------------------------------|
| M1 macrophage    | IL-1 $\beta$ , sIL-1RA, IL-6, TNF- $\alpha$ , CXCL8, CCL3                                                                      |
| T helper-1       | IL-2, IFN- $\gamma$ , IL-12                                                                                                    |
| T helper-2       | IL-4, IL-5, IL-9, IL-13                                                                                                        |
| T helper-17      | IL-6, IL-17                                                                                                                    |
| IRS              | IL-1 $\beta$ , IL-6, TNF- $\alpha$ , CXCL8, CCL3, IL-2, IFN- $\gamma$ , IL-12, IL-17, IL-15, G-CSF, GM-CSF, CXCL10, CCL5, CCL2 |
| CIRS             | IL-4, IL-10, sIL-1RA                                                                                                           |
| Neuroimmunotoxic | IL-1 $\beta$ , IL-6, TNF- $\alpha$ , CXCL8, CCL3, IL-2, IFN- $\gamma$ , IL-12, IL-17, CXCL10, CCL11, CCL5, CCL2                |
| Growth factors   | FGF, PDGF, VEGF                                                                                                                |
| T cell growth    | IL4, IL9, IL12, GM-CSF, IL-15                                                                                                  |

These profiles were computed as z unit based composite scores

IRS: immune-inflammatory response system; CIRS: compensatory immunoregulatory system

Adapted from: Rachayon, M.; Jirakran, K; Sodsai, P; Klinchanhom, S.; Sughondhabirrom, A.; Plaimas, K.; Suratanee, A.; Maes, M. Effects of cannabidiol on activated immune-inflammatory pathways in major depressive patients and healthy controls. Pharmaceuticals, 2022, in press.

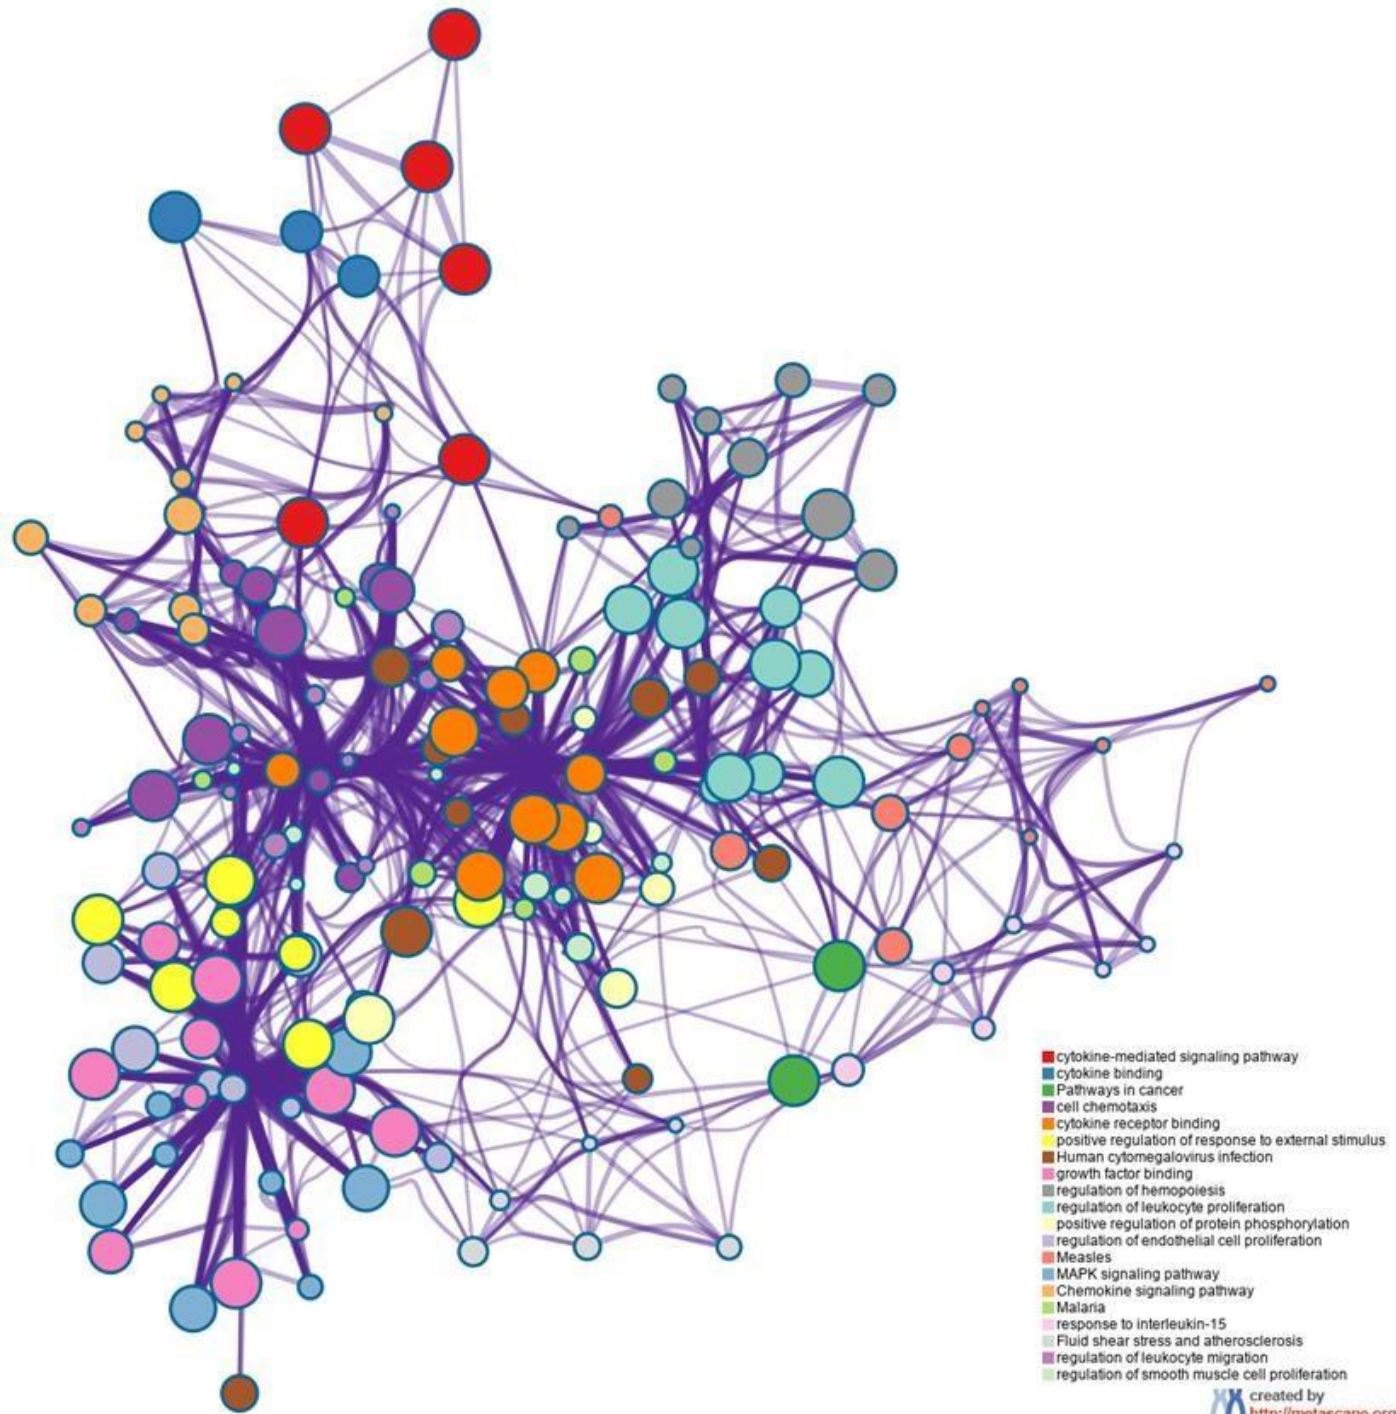

**ESF Figure S1.** Enriched ontology term clusters in the protein-protein-interaction network of Adverse Childhood Experiences. Circular nodes represent the terms that are overrepresented and their size reflects the amount of input genes. Colors identify clusters of terms and the colored labels describe the terms employed to characterize the clusters. The thickness of the bundled edges represents the similarity score with a threshold of 0,3. The network is generated using MetaScape.

## Signal Transduction

## Kinesns

### Response of to heme deficiency

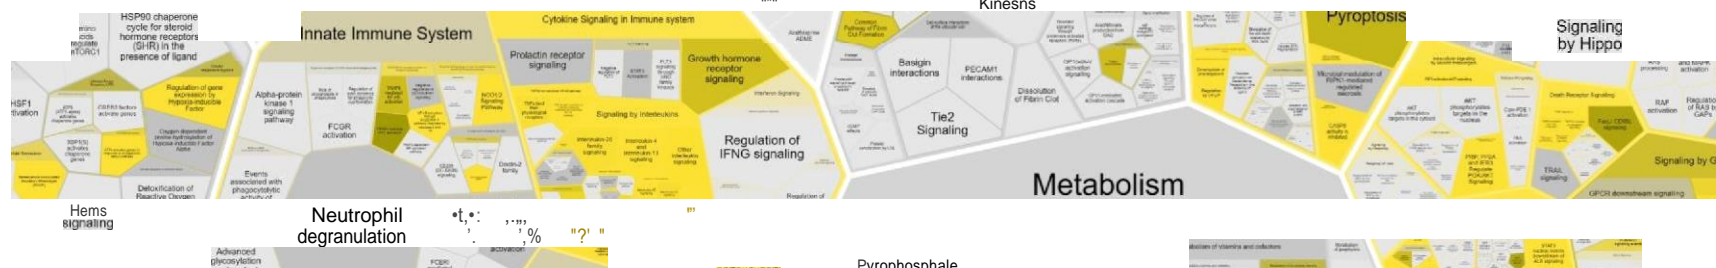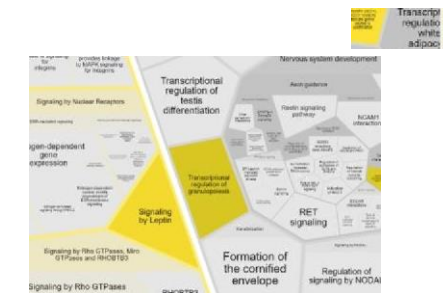

Gene expression (Transcription)

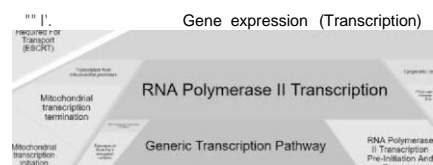

Pyrophosphale

## Metabolism of lipids

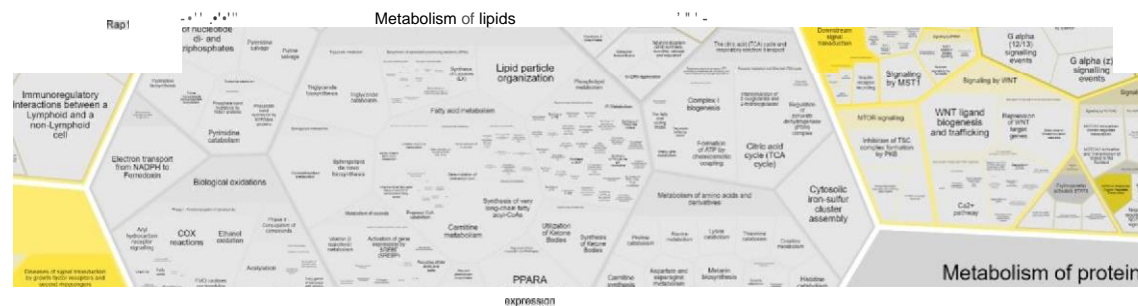

## ONA Repair

Disease

\*ransool oT smal molecules

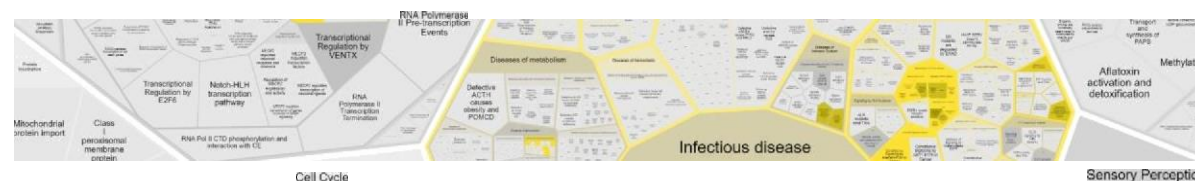

### Sensory Perception

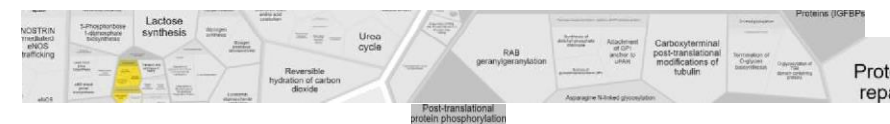

Protein

ol NNA

Post-translational  
protein phosphorylation

## Expression and translocation of olfactory receptors

%\*

“

n Amyloid fiber formation

| Strived Muscle Contraction                                                                                                                                                                                                                                                                                                                                        | Smooth Muscle Contraction                                                                                                                                                                                                                                                                                                                               |
|-------------------------------------------------------------------------------------------------------------------------------------------------------------------------------------------------------------------------------------------------------------------------------------------------------------------------------------------------------------------|---------------------------------------------------------------------------------------------------------------------------------------------------------------------------------------------------------------------------------------------------------------------------------------------------------------------------------------------------------|
| <p>1. Rapid onset of contraction</p> <p>2. Rapid relaxation</p> <p>3. High tension</p> <p>4. High speed</p> <p>5. High force</p> <p>6. High speed of contraction</p> <p>7. High speed of relaxation</p> <p>8. High speed of contraction and relaxation</p> <p>9. High speed of contraction and relaxation</p> <p>10. High speed of contraction and relaxation</p> | <p>1. Slow onset of contraction</p> <p>2. Slow relaxation</p> <p>3. Low tension</p> <p>4. Low speed</p> <p>5. Low force</p> <p>6. Low speed of contraction</p> <p>7. Low speed of relaxation</p> <p>8. Low speed of contraction and relaxation</p> <p>9. Low speed of contraction and relaxation</p> <p>10. Low speed of contraction and relaxation</p> |

[illegible]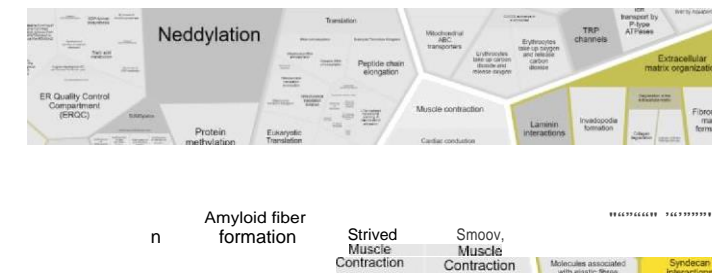

**ESF Figure S2.** Voronoi visualization of the hierarchical pathways overrepresented in the protein-protein interaction network of the genes that are upregulated in subjects with Adverse Childhood Experiences. This figure was constructed employing the Reactome pathway analysis.

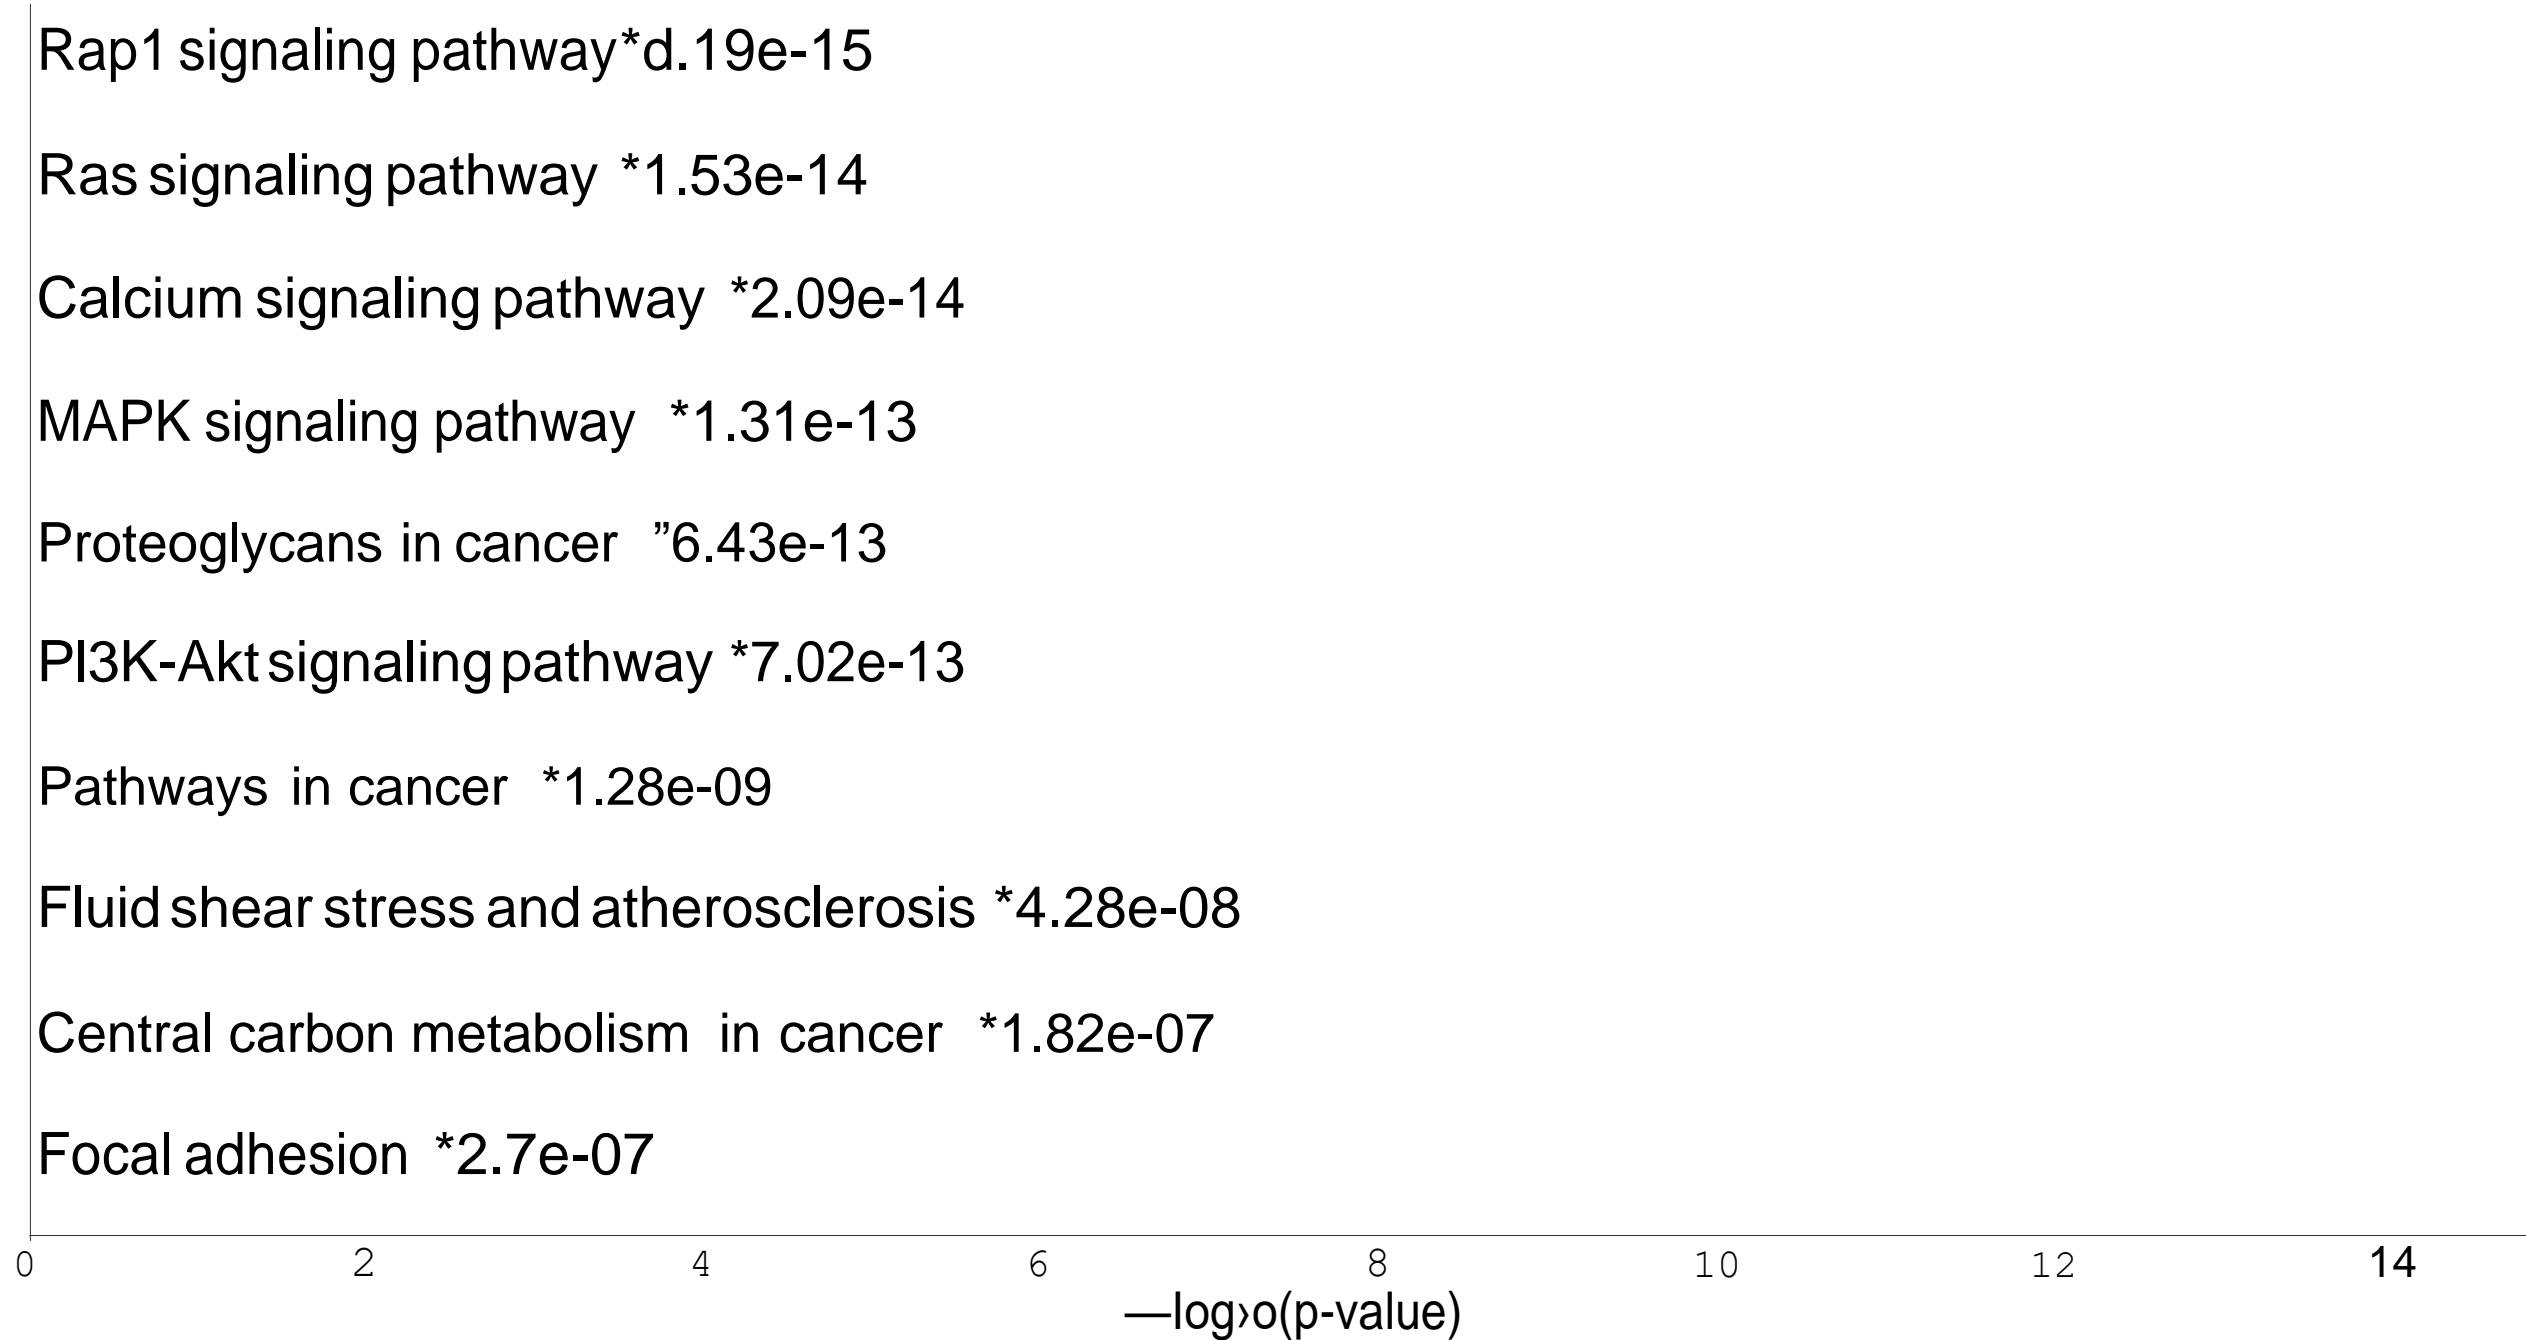

**ESF Figure S3.** Bar graph made using Enrichr and visualized with Appyter showing the top 10 Kegg pathways which are overrepresented in the protein-protein network of the growth factor genes of Adverse Childhood Experiences.

# WikiPathway 2021 Human

Focal Adhesion-PI3K-Akt-mTOR-signaling pathway WP3932 \*1.54e-15

Angiogenesis WP1539 \*7.53e-15

PI3K-Akt signaling pathway WP4172 \*4.88e-13

EGFR Tyrosine Kinase Inhibitor Resistance WP4806 \*2.22e-11

Pathways Regulating Hippo Signaling WP4540 \*5.72e-11

Hippo-Merlin Signaling Dysregulation WP4541 \*1.97e-10

Ras signaling WP4223 \*2.51e-09

SARS-CoV-2 altering angiogenesis via NRP1 WP50s5 \*3.41e-09

ESC Pluripotency Pathways WP3931 \*1.72e-08

Regulation of Actin Cytoskeleton WP51 \*1.27e-08

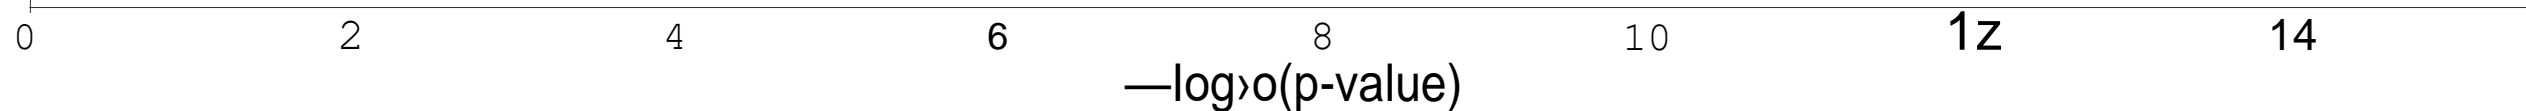

**ESF Figure S4.** Bar graph made using Enrichr and Appyter showing the top 10 Wikipathways which are overrepresented in the growth factor network of Adverse Childhood Experiences.
